# Supplementary material
Source: publisher figshare collection journal article supplement (https://tandf.figshare.com/articles/dataset/_/1632786)

Fig. S2

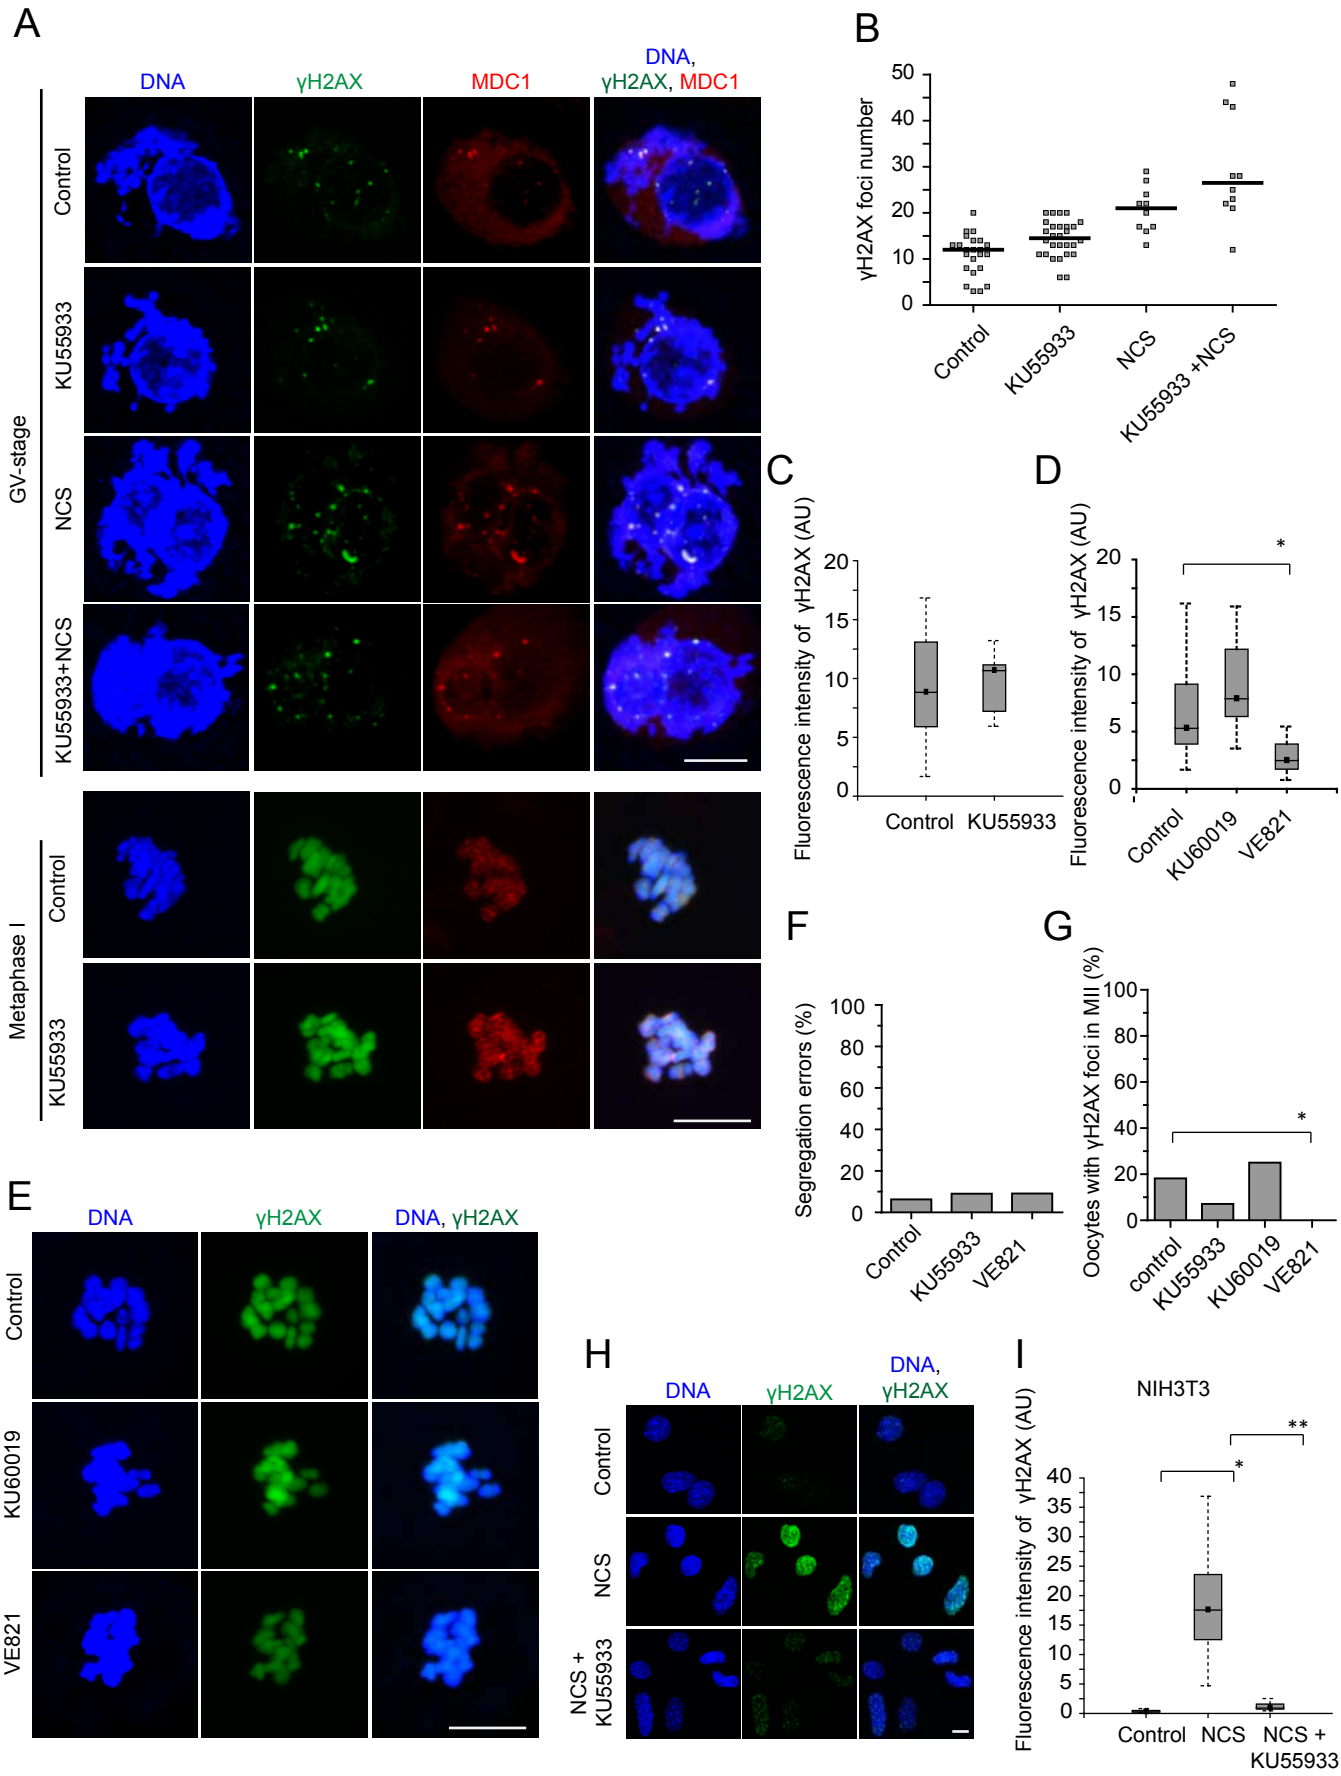

Supplement: Supplementary file 1 [file 1]

**Fig. S1**

**A**

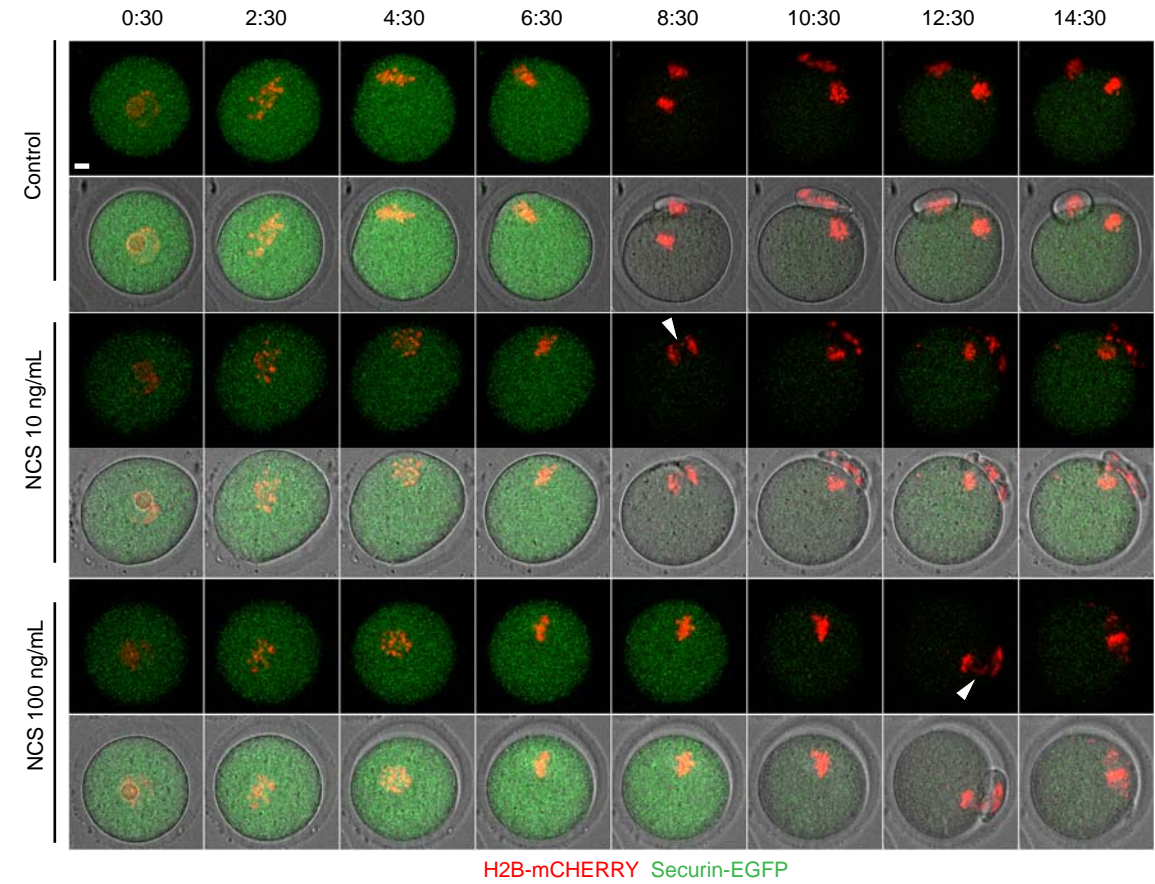

**B**

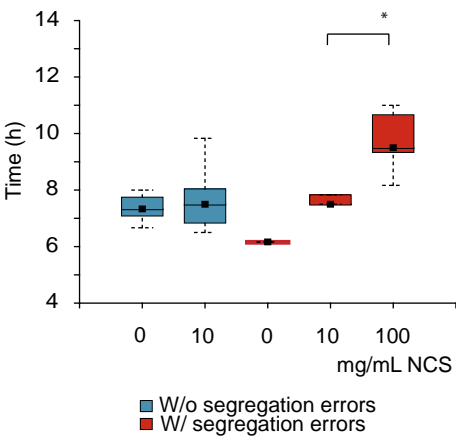

**C**

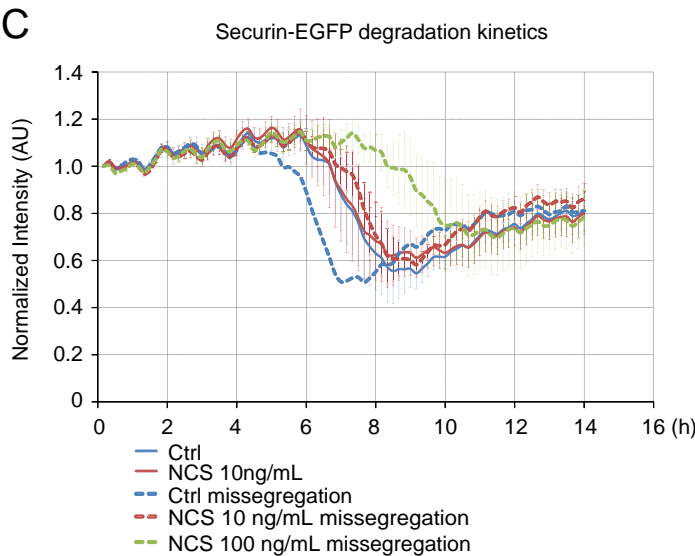

Supplement: Supplementary file 2 [file 1]

Fig. S4

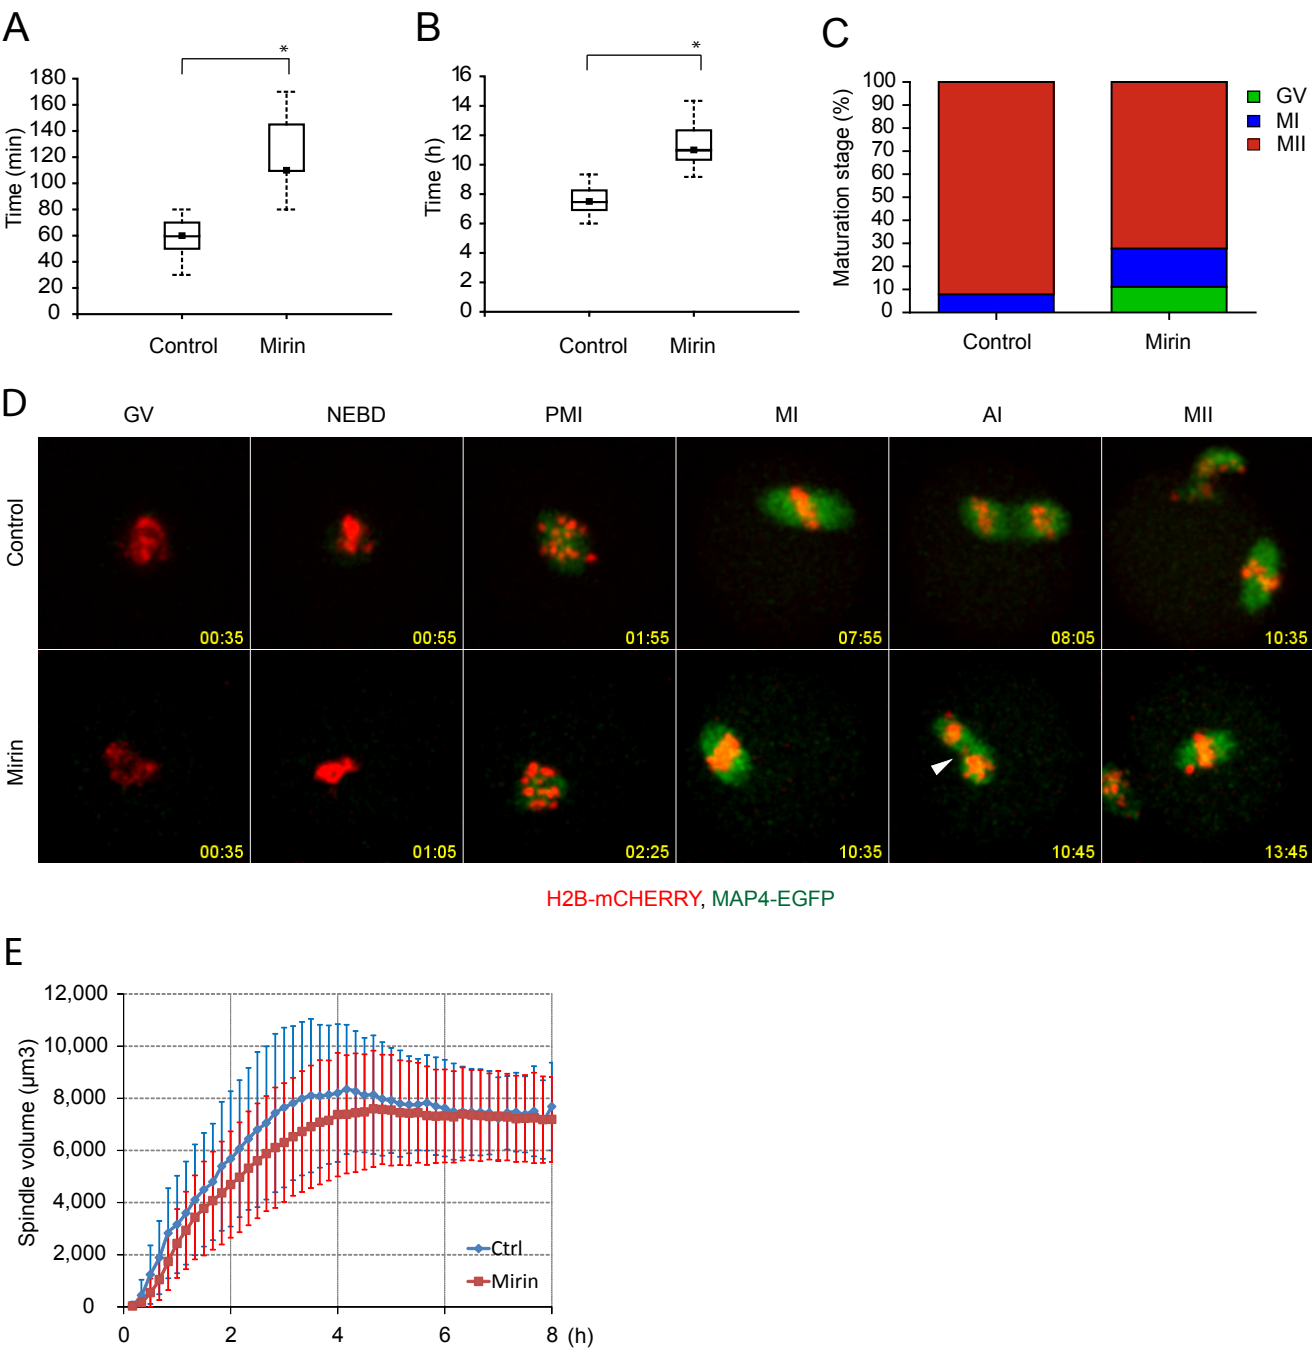

Supplement: Supplementary file 4 [file 1]

Fig. S3

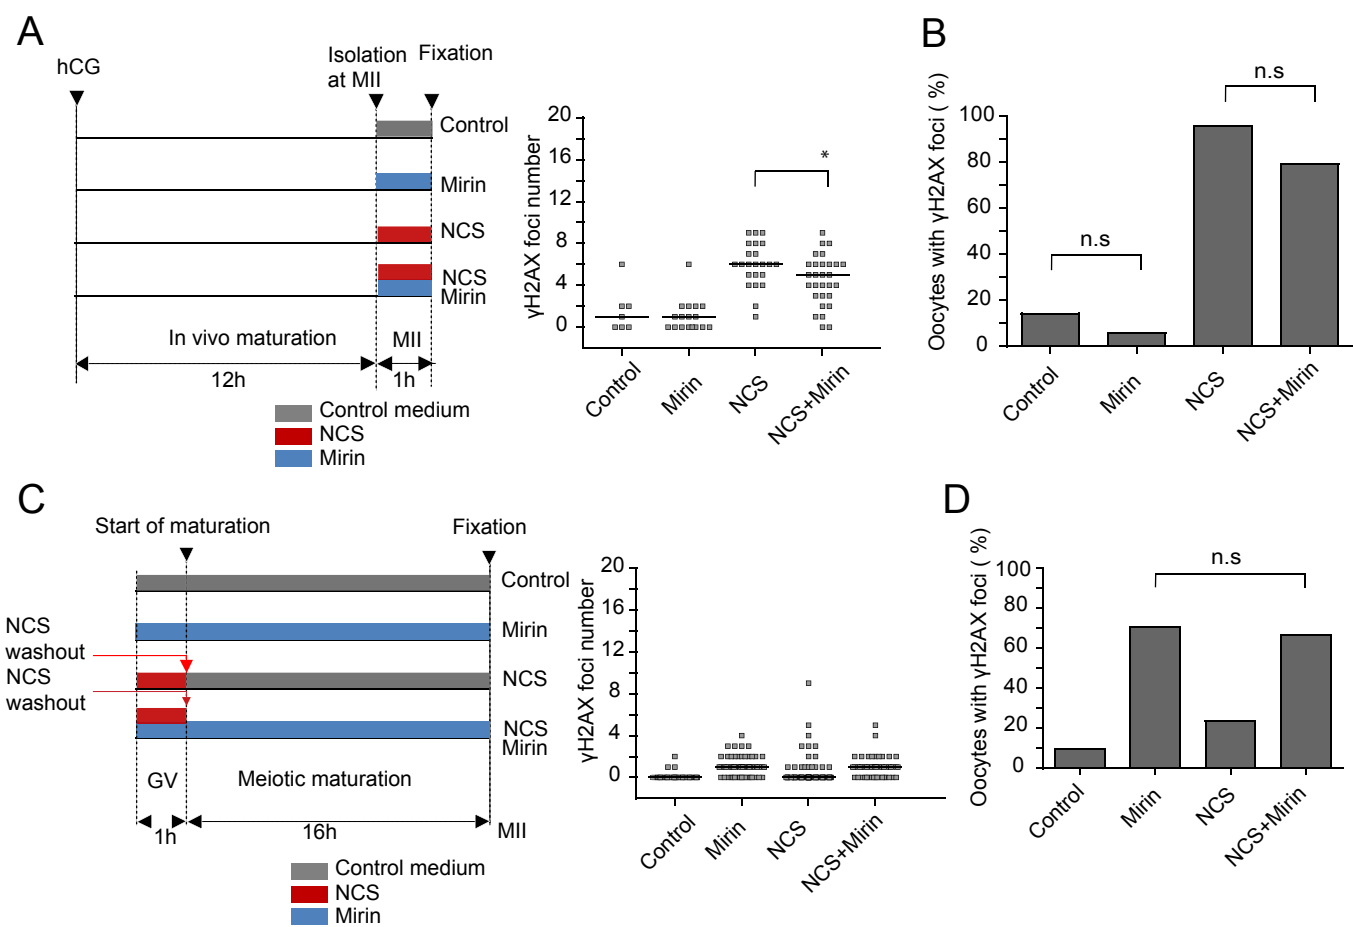

Supplement: Supplementary file 5 [file 1]
